# Supplementary material for: Long-term Bowel function and pediatric health-related quality of life after transanal rectal mucosectomy and partial internal anal sphincterectomy pull-through for Hirschsprung Disease
Source: Frontiers journal article supplement (doi:10.3389/fped.2023.1099606), 2023-02-14
Supplement: Data_Sheet_1.pdf [file Data_Sheet_1.pdf]

**Supplementary Table 1.** The Bowel Function Score (BFS) system, designed by R.J. Rintala in 1995, for the assessment of bowel functional outcomes with a maximum score of 20. Individual items are scored 0-3, except for the frequency of defecation which is scored 1-2. A BFS>17 is interpreted as a good functional outcome.

| <b>Bowel Function Score (BFS)</b>                | <b>Score</b> |
|--------------------------------------------------|--------------|
| <b>Feels the urge to defecate</b>                |              |
| Always                                           | 3            |
| Most of the time                                 | 2            |
| Uncertain                                        | 1            |
| Absent                                           | 0            |
| <b>Ability to hold back defecation</b>           |              |
| Always                                           | 3            |
| Problems less than once a week                   | 2            |
| Weekly problems                                  | 1            |
| No voluntary control                             | 0            |
| <b>Fecal soiling</b>                             |              |
| Never                                            | 3            |
| Staining less than once a week                   | 2            |
| Frequent soiling, change of underwear required   | 1            |
| Daily soiling, protective aids required          | 0            |
| <b>Fecal accidents</b>                           |              |
| Never                                            | 3            |
| Less than once a week                            | 2            |
| Weekly accidents, protective aids often required | 1            |
| Daily, protective aids required day and night    | 0            |
| <b>Constipation</b>                              |              |
| No constipation                                  | 3            |
| Manageable with diet                             | 2            |
| Manageable with laxatives                        | 1            |
| Manageable with enemas                           | 0            |
| <b>Social problems</b>                           |              |
| No social problems                               | 3            |
| Sometimes (fouls odors)                          | 2            |
| Problems causing restrictions in social life     | 1            |
| Major social/psychosocial problems               | 0            |
| <b>Frequency of defecation</b>                   |              |
| Every other day-twice a day                      | 2            |
| More often/ Less often                           | 1            |

**Supplementary Table 2.** The PedsQL™ questionnaire was used to assess QoL. This questionnaire is a practical and validated modular instrument for measuring the pediatric health-related quality of life (HRQOL) in children aged 4 to 18 years. The scale utilized measures the core dimensions of physical, emotional, social and school functioning.

**Ped QL(4-12y) Parent\_report**

|                                                                 | <b>Never</b> | <b>almost<br/>never</b> | <b>sometime</b> | <b>often</b> | <b>almost always</b> |
|-----------------------------------------------------------------|--------------|-------------------------|-----------------|--------------|----------------------|
| <b>Physical functioning</b>                                     | 100          | 75                      | 50              | 25           | 0                    |
| walking more than one block                                     | 100          | 75                      | 50              | 25           | 0                    |
| running                                                         | 100          | 75                      | 50              | 25           | 0                    |
| participating in sports activity or exercise                    | 100          | 75                      | 50              | 25           | 0                    |
| lifting something heavy                                         | 100          | 75                      | 50              | 25           | 0                    |
| taking a bath or shower by him or herself                       | 100          | 75                      | 50              | 25           | 0                    |
| doing chores around the house                                   | 100          | 75                      | 50              | 25           | 0                    |
| having hurts or aches                                           | 100          | 75                      | 50              | 25           | 0                    |
| low energy level                                                | 100          | 75                      | 50              | 25           | 0                    |
|                                                                 |              |                         |                 |              |                      |
| <b>Emotional functioning</b>                                    | 100          | 75                      | 50              | 25           | 0                    |
| feeling afraid or scared                                        | 100          | 75                      | 50              | 25           | 0                    |
| feeling sad or blue                                             | 100          | 75                      | 50              | 25           | 0                    |
| feeling angry                                                   | 100          | 75                      | 50              | 25           | 0                    |
| trouble sleeping                                                | 100          | 75                      | 50              | 25           | 0                    |
| worrying about what will happen to him or her                   | 100          | 75                      | 50              | 25           | 0                    |
|                                                                 |              |                         |                 |              |                      |
| <b>Social functioning</b>                                       | 100          | 75                      | 50              | 25           | 0                    |
| getting along with other children                               | 100          | 75                      | 50              | 25           | 0                    |
| other kids not wanting to be his or her friend                  | 100          | 75                      | 50              | 25           | 0                    |
| getting teased by other children                                | 100          | 75                      | 50              | 25           | 0                    |
| not able to do things that other children his or her age can do | 100          | 75                      | 50              | 25           | 0                    |
| keeping up when playing with other children                     | 100          | 75                      | 50              | 25           | 0                    |
|                                                                 |              |                         |                 |              |                      |
| <b>School functioning</b>                                       | 100          | 75                      | 50              | 25           | 0                    |
| paying attention in class                                       | 100          | 75                      | 50              | 25           | 0                    |
| forgetting things                                               | 100          | 75                      | 50              | 25           | 0                    |
| keeping up with schoolwork                                      | 100          | 75                      | 50              | 25           | 0                    |
| missing school because of not feeling well                      | 100          | 75                      | 50              | 25           | 0                    |
| missing school to go to the doctor or hospital                  | 100          | 75                      | 50              | 25           | 0                    |

**Supplementary Table 3.** Effects of age on various aspects of fecal control including urgency, rectal sensation, ability to hold back defecation, and fecal accidents, as well as constipation, social problems and total bowel function score.

|                                        | 4-7years | 7-10years | >10years | p            |
|----------------------------------------|----------|-----------|----------|--------------|
| <b>Feels the urge to defecate</b>      | 72.0%    | 86.6%     | 96.4%    | <b>0.020</b> |
| <b>Ability to hold back defecation</b> | 73.8%    | 75.0%     | 92.8%    | 0.272        |
| <b>Fecal soiling</b>                   | 25.2%    | 43.3%     | 50.0%    | <b>0.013</b> |
| <b>Accidents</b>                       | 86.4%    | 96.6%     | 100.0%   | 0.164        |
| <b>Constipation</b>                    | 87.3%    | 96.6%     | 100.0%   | 0.117        |
| <b>Social problems</b>                 | 87.3%    | 96.6%     | 96.4%    | 0.214        |
| <b>BFS</b>                             | 70.2%    | 85.0%     | 96.4%    | <b>0.004</b> |

**Supplementary Table 4.** Effects of early enterocolitis on various aspects of fecal control including urgency, rectal sensation, ability to hold back defecation, and fecal accidents, as well as constipation, social problems and total bowel function score.

|                                        | non-HEAC Group | HEAC Group | P                |
|----------------------------------------|----------------|------------|------------------|
| <b>Feels the urge to defecate</b>      | 85.20%         | 39.10%     | <b>&lt;0.001</b> |
| <b>Ability to hold back defecation</b> | 80.60%         | 47.80%     | <b>0.002</b>     |
| <b>Fecal soiling</b>                   | 38.60%         | 0.00%      | <b>&lt;0.001</b> |
| <b>Fecal accidents</b>                 | 93.10%         | 78.20%     | 0.115            |
| <b>Constipation</b>                    | 94.30%         | 73.90%     | <b>0.001</b>     |
| <b>Social problems</b>                 | 93.10%         | 78.20%     | <b>0.019</b>     |
| <b>BFS</b>                             | 84.00%         | 34.70%     | <b>&lt;0.001</b> |

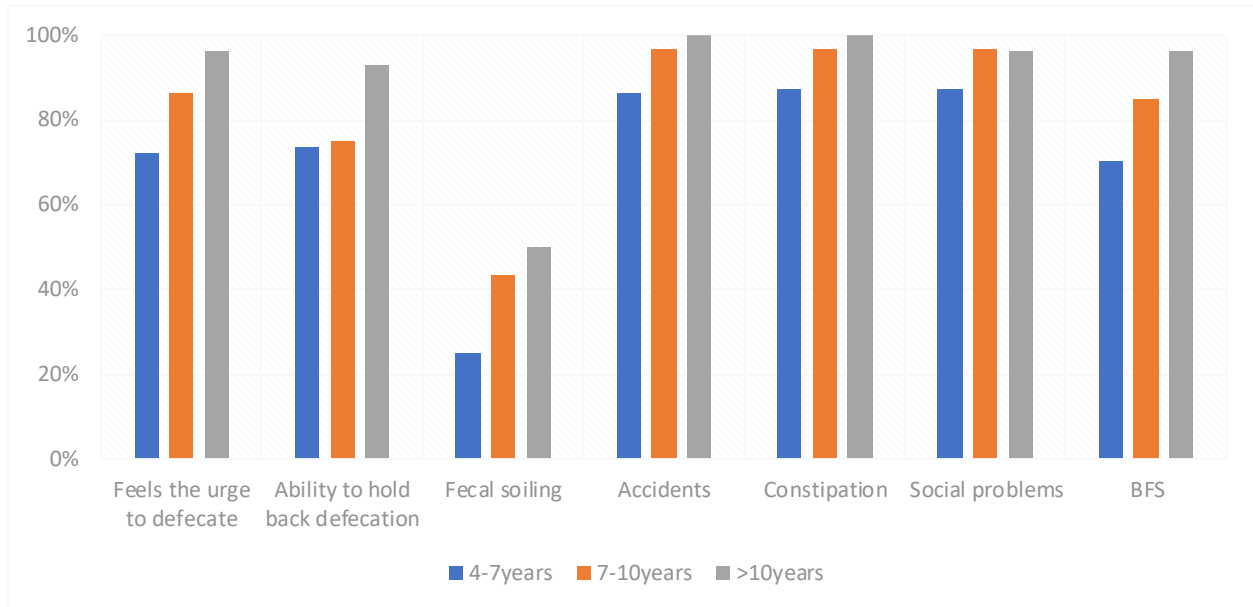

**Supplementary Figure 1 Evolution of individual bowel function items in patients and matched controls of different ages.** Percentage of subjects reporting great degree(score=3) of respective impairment.

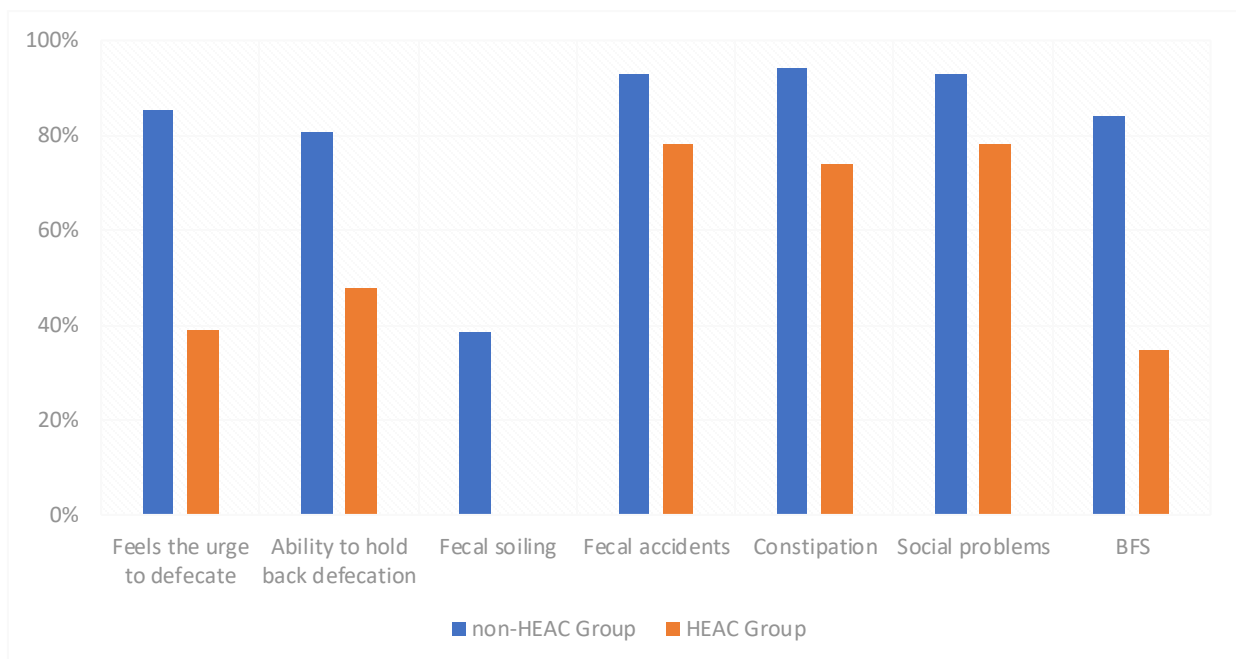

**Supplementary Figure 2 Evolution of individual bowel function items in non-HAEC patients and HAEC patients.** Percentage of subjects reporting great degree(score=3) of respective impairment.
